# Supplementary material for: Quelling targets the rDNA locus and functions in rDNA copy number control
Source: PubMed Central journal article supplement (PMC2650698; doi:10.1186/1471-2180-9-44), 2009-02-25

**northern  
blotting  
NTS siRNA**

**25 nt**  
→

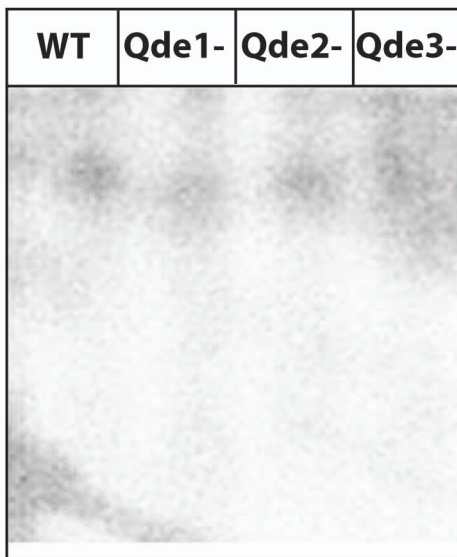

**Total RNA  
(EtBr)**

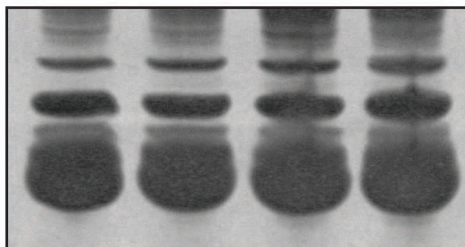

Supplement: 1471-2180-9-44-S1.pdf [file 1471-2180-9-44-S1.pdf]
